# Supplementary material for: Lung toxicity and biodistribution of Cd/Se-ZnS quantum dots with different surface functional groups after pulmonary exposure in rats
Source: PubMed Central journal article supplement (PMC3599433; doi:10.1186/1743-8977-10-5), 2013-03-04
Supplement: 1743-8977-10-5-S1.pdf [file 1743-8977-10-5-S1.pdf]

**Percent Size Distribution of QD Particles/Aggregates Measured by  
Dynamic Light Scattering (DLS)**

| <b>QD-NH<sub>2</sub></b>                        |                    | <b>QD-COOH</b>                                  |                    |
|-------------------------------------------------|--------------------|-------------------------------------------------|--------------------|
| <b>Diameter (nm)</b>                            | <b>% of Sample</b> | <b>Diameter (nm)</b>                            | <b>% of Sample</b> |
| 102.2                                           | 0.68               | 243                                             | 0.89               |
| 85.9                                            | 3.18               | 204.4                                           | 3.38               |
| 72.3                                            | 6.8                | 171.9                                           | 7.13               |
| 60.8                                            | 8.52               | 144.5                                           | 8.93               |
| 51.1                                            | 8.46               | 121.5                                           | 7.84               |
| 43                                              | 8.55               | 102.2                                           | 5.91               |
| 36.1                                            | 9.7                | 85.9                                            | 4.57               |
| 30.4                                            | 11.8               | 72.3                                            | 4.11               |
| 25.55                                           | 13.96              | 60.8                                            | 4.45               |
| 21.48                                           | 15.05              | 51.1                                            | 5.58               |
| 18.06                                           | 13.3               | 43                                              | 7.55               |
|                                                 |                    | 36.1                                            | 10.35              |
|                                                 |                    | 30.4                                            | 13.67              |
|                                                 |                    | 25.55                                           | 15.64              |
| <b>Median Hydrodynamic<br/>Diameter= ~29 nm</b> |                    | <b>Median Hydrodynamic<br/>Diameter= ~50 nm</b> |                    |
